# Supplementary material for: Human Wharton’s Jelly Mesenchymal Stem Cell-Mediated Sciatic Nerve Recovery Is Associated with the Upregulation of Regulatory T Cells
Source: PubMed Central journal article supplement (PMC7504196; doi:10.3390/ijms21176310), 2020-08-31
Supplement: ijms-21-06310-s001.pdf [file ijms-21-06310-s001.pdf]

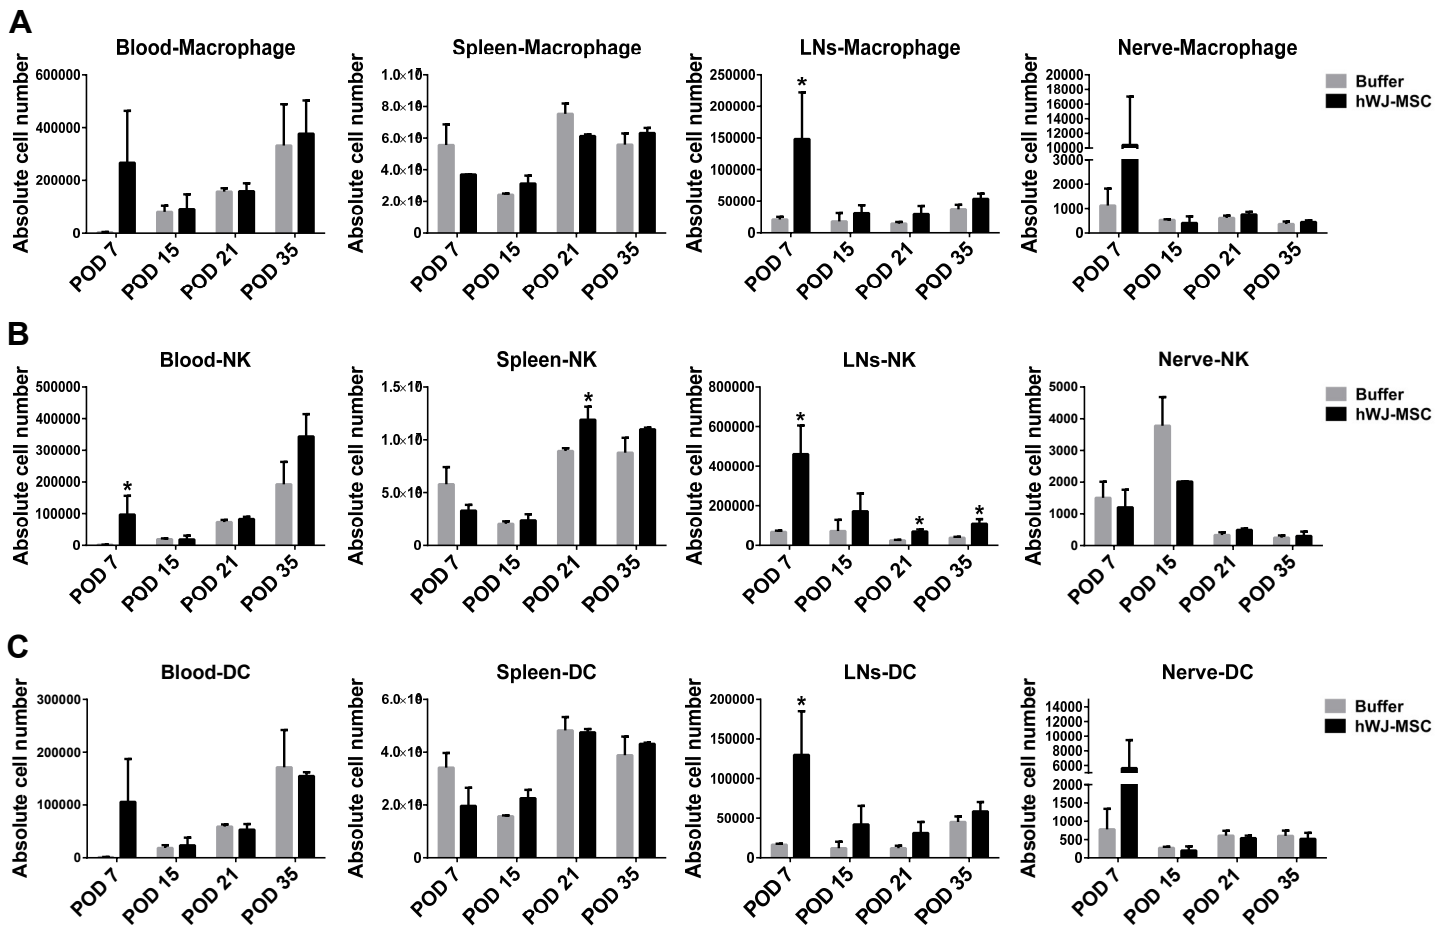

**Figure 1. Effects of hWJ-MSC on innate immunity in sciatic nerve-injured mice.** (A, B, C) The absolute number of macrophages, NKs, and DCs in blood, spleen, LNs, and nerve-infiltrating cells. Immune cells in the two groups (N=3) were harvested and analyzed using flow cytometry on POD7, 15, 21, and 35. The cells were stained to identify CD11b<sup>+</sup> macrophages, NK1.1<sup>+</sup> NKs, and CD11c<sup>+</sup> DCs. The statistical data were represented as the mean  $\pm$  SD. \*P < 0.05.

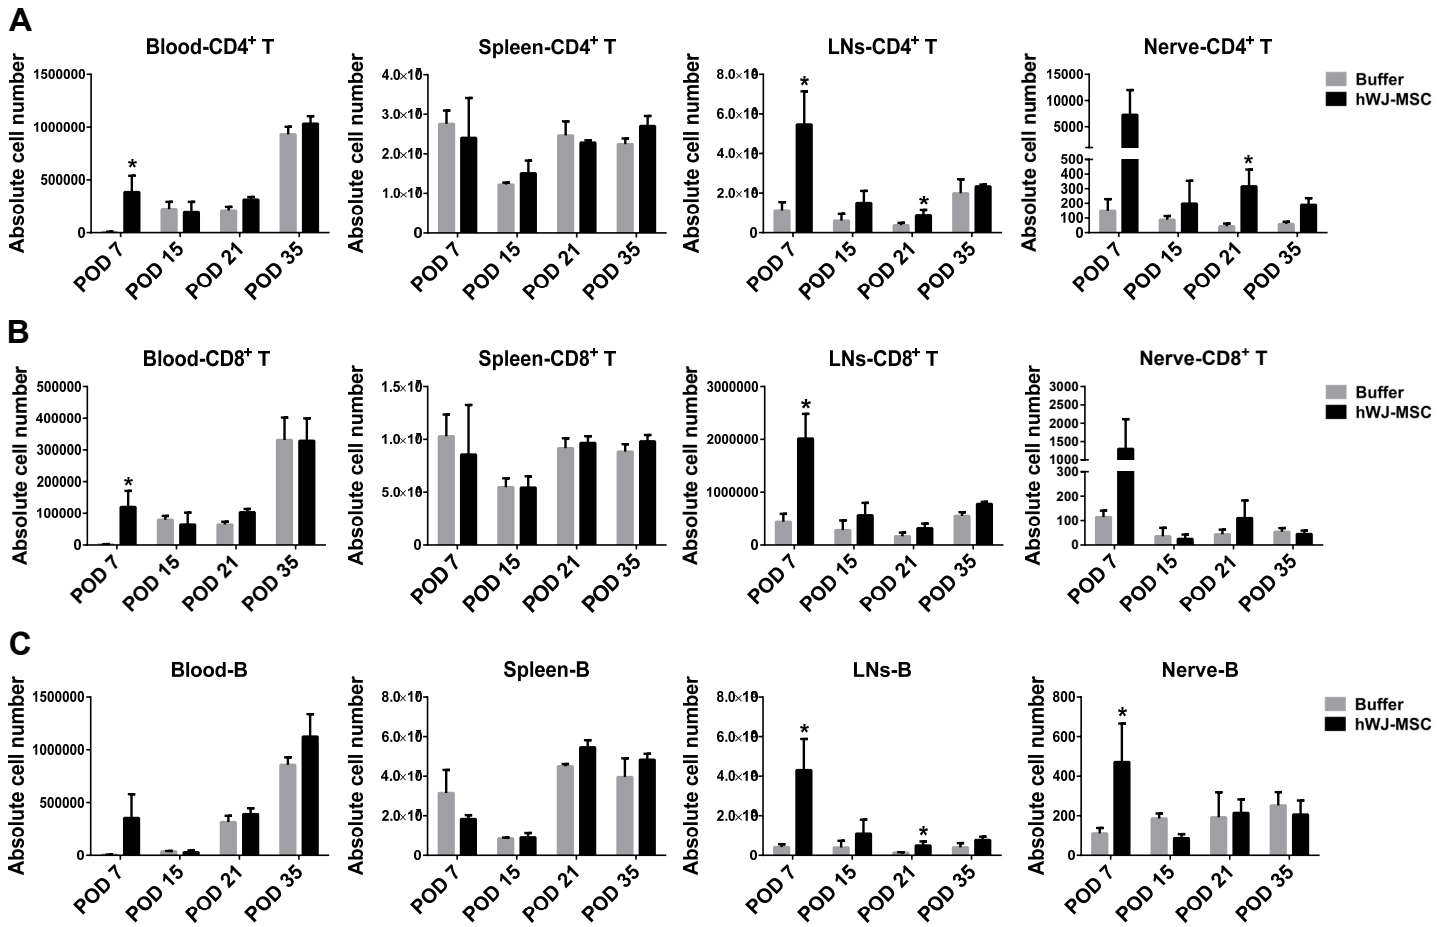

**Figure 2. Effects of hWJ-MSC on adaptive immunity in sciatic nerve-injured mice.** (A, B, C) The absolute number of CD4<sup>+</sup> T, CD8<sup>+</sup> T, and B cells in blood, spleen, LNs, and nerve-infiltrating cells. Immune cells in the two groups (N=3) were harvested and analyzed using flow cytometry on POD7, 15, 21, and 35. The cells were stained to identify CD4<sup>+</sup> T, CD8<sup>+</sup> T, and CD19<sup>+</sup> B cells. The statistical data were represented as the mean  $\pm$  SD. \*P < 0.05.

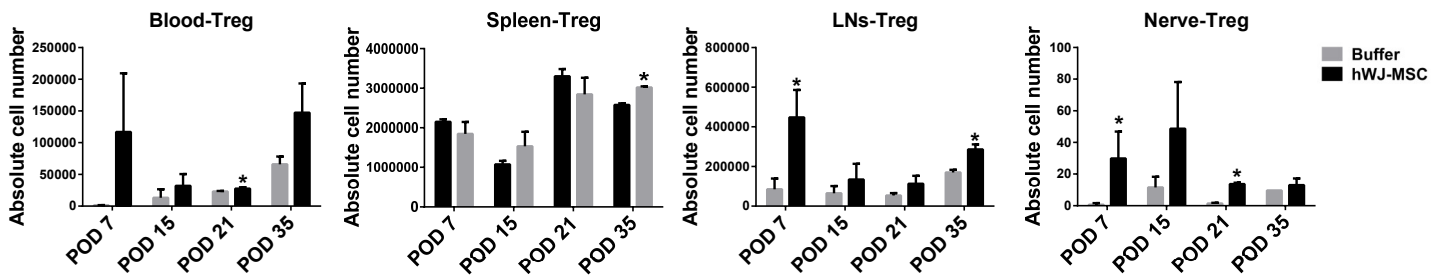

**Figure 3. Effects of hWJ-MSC on Treg cells in sciatic nerve-injured mice.** The absolute number of regulatory T cells (Tregs) in blood, spleen, LNs, and nerve-infiltrating cells. Tregs in the two groups (N=3) were harvested and analyzed using flow cytometry on POD7, 15, 21, and 35. The cells were stained to identify CD4<sup>+</sup>CD25<sup>+</sup>FoxP3<sup>+</sup> Tregs. The statistical data were represented as a mean  $\pm$  SD. \*P < 0.05.

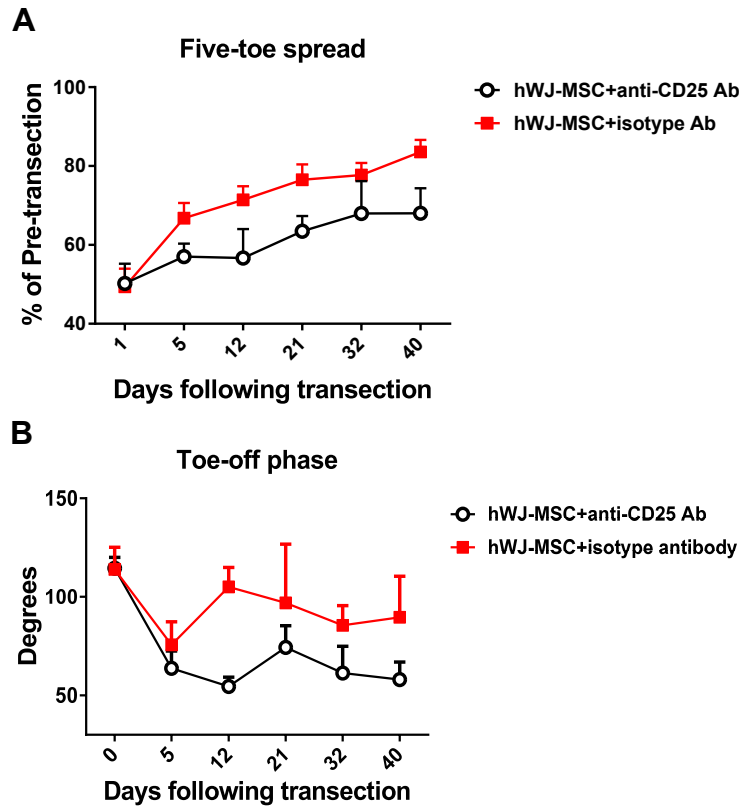

**Figure 4. Anti-CD25 antibody administration eliminated the hWJ-MSC-mediated functional recovery in hindlimbs.** (A) An anti-CD25 antibody worsened the functional recovery of the five-toe spread reflex. hWJ-MSC ( $5 \times 10^5$ ) in  $50 \mu\text{l}$  were added to the space created in the musculature of each mouse. Progressive chart of the percentage of the pre-transection five-toe spread distance measured over time after the division of the sciatic nerve in the anti-CD25- and isotype-treated groups. The differences between the mean  $\pm$  SD of the two groups were significant ( $P$  value  $< 0.05$ , one-way ANOVA; anti-CD25 vs isotype control,  $P = 0.01$ ; Tukey's test). The average five-toe spread in the normal mouse group was  $9.811 \pm 0.057$  mm. (B) The anti-CD25 antibody worsened gait stance and movement. The angles were measured in both groups after transection surgery. The mean  $\pm$  SD values were significantly different in the two groups ( $P$  value  $< 0.05$ , one-way ANOVA; anti-CD25 vs isotype control,  $P = 0.04$ ; Tukey's test). The average angle of the normal mouse group was  $110.0^\circ \pm 0.72^\circ$ .

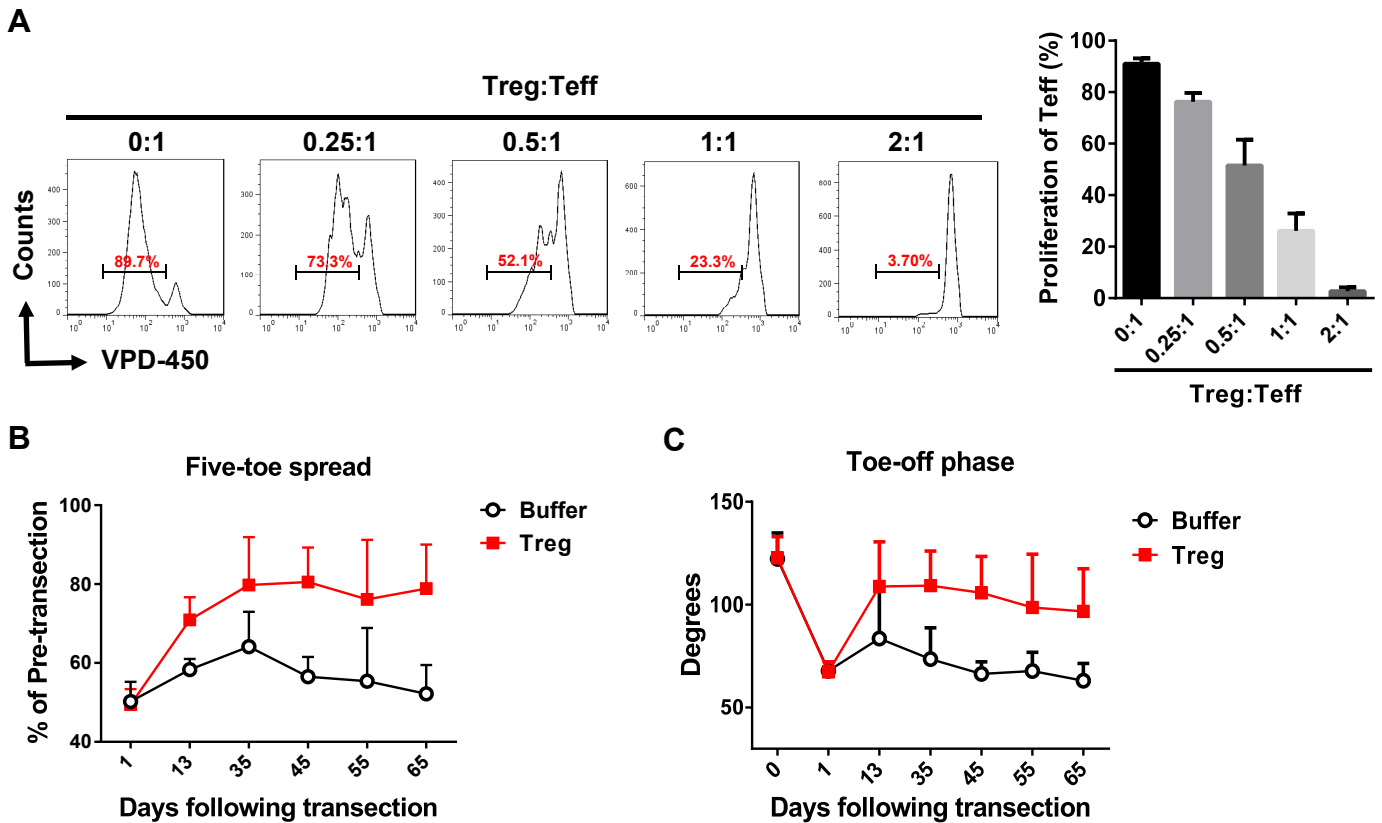

**Figure 5. Treg administration improved the functional recovery of the sciatic nerve.** (A) CD4<sup>+</sup>CD25<sup>+</sup> Tregs (Treg) were isolated with a purity of >90% from naïve mice using a mouse CD4<sup>+</sup>CD25<sup>+</sup> regulatory T cell isolation kit and an autoMACS instrument. CD4<sup>+</sup>CD25<sup>-</sup> effector T cells (Teff) were isolated with a purity of >90% using an autoMACS instrument. Tregs were co-cultured with VPD-450-labeled effector T cells under anti-CD3 (2 µg/ml) and anti-CD28 (2 µg/ml) stimulation for 3 days before analysis using flow cytometry. The difference between the mean ± SD values of the Treg mixture (0.25~2:1) and Teff (0:1) groups was significant in all cases ( $P < 0.005$ , Student's t test). (B) Tregs promoted the functional recovery of the five-toe spread reflex. Isolated Tregs ( $5 \times 10^5$ ) with a purity of >90% were added to the space created in the musculature of each mouse. Progressive chart of the percentage of the pre-transection five-toe spread distance measured over time after the division of the sciatic nerve in the buffer and Treg groups. The differences between the mean ± SD values of the two groups were significant ( $P$  value < 0.05, one-way ANOVA; Treg vs buffer control,  $P = 0.02$ ; Tukey's test). The average five-toe spread in the normal mouse group was  $9.950 \pm 0.158$  mm. (C) Tregs promoted gait-stance and movement improvement. The angles were measured in both groups after the transection surgery. Comparison of the mean ± SD values in the two groups revealed the presence of a significant difference ( $P$  value < 0.005, one-way ANOVA; Treg vs buffer control,  $P = 0.01$ ; Tukey's test). The average angle of the normal mouse group was  $122.5^\circ \pm 2.89^\circ$ .

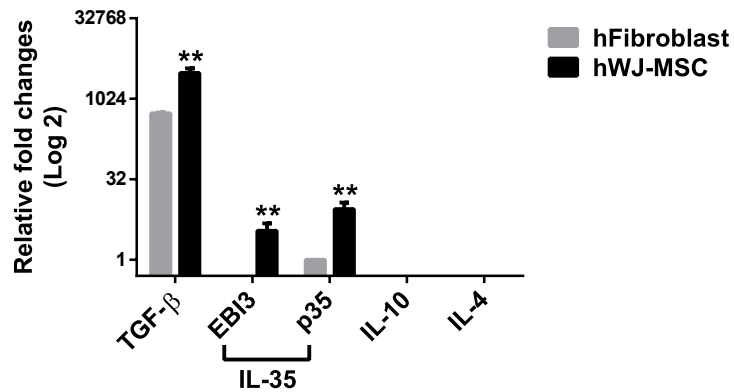

**Figure 6. Quantification of hWJ-MSC-derived cytokine expression.** The expression of mRNAs for Treg-associated cytokines, such as TGF- $\beta$ , IL-10, IL-4, and IL-35 (which are composed of EBI3 and p35), in hWJ-MSC and fibroblasts was quantified using qPCR. The levels of expression of cytokines were normalized to that of GAPDH. The difference between the mean  $\pm$  SD values of the hWJ-MSC and fibroblast groups was significant ( $P < 0.005$ , Student's t test).

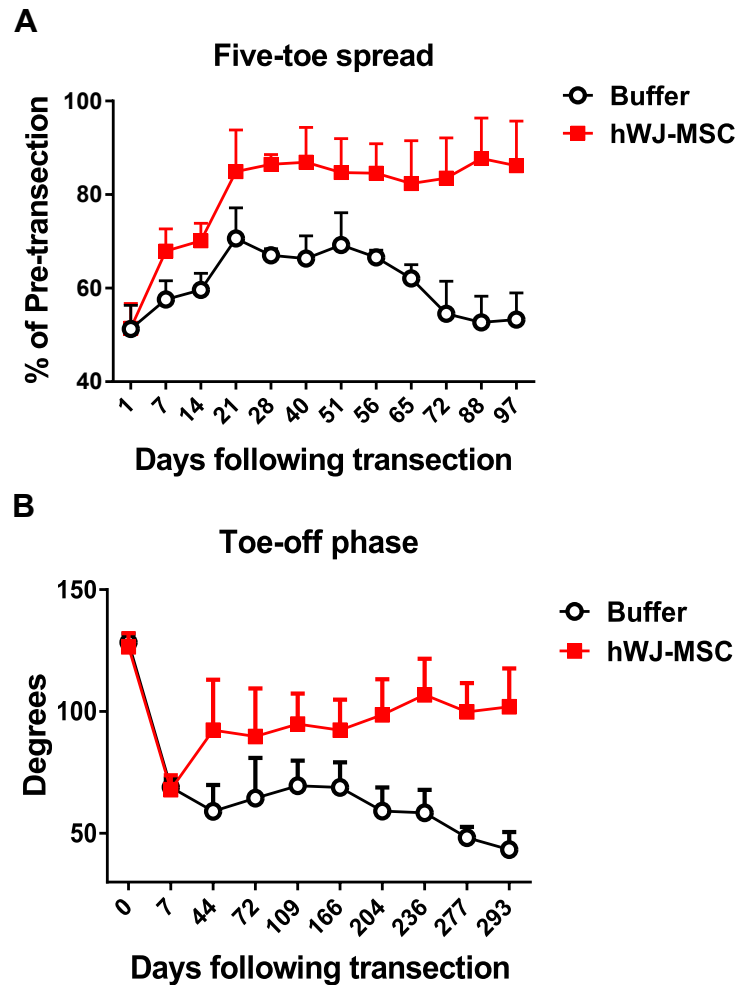

**Supplementary Figure 1. hWJ-MSC promoted the functional recovery of injured and repaired sciatic nerves in the extremities.** (A) hWJ-MSC accelerated the functional recovery of the five-toe spread reflex. Progressive chart of the percentage of the pre-transection five-toe spread distance measured over time after the division of the sciatic nerve in the buffer and hWJ-MSC groups. The differences between the mean  $\pm$  SD of the buffer and hWJ-MSC groups were significant ( $P$  value  $< 0.0001$ , one-way ANOVA; buffer vs hWJ-MSC,  $P = 0.0001$ ; Tukey's test). The average five-toe spread in the normal mouse group was  $9.911 \pm 0.04832$  mm. (B) hWJ-MSC restored normal gait stance and movement. The angles were measured in the buffer and hWJ-MSC groups for up to 293 days after the transection surgery. Comparison of the mean  $\pm$  SD values in the two groups revealed the presence of a significant difference ( $P = 0.0008$ , one-way ANOVA; buffer vs hWJ-MSC,  $P = 0.0030$ ; Tukey's test). The average angle of the normal mouse group was  $128.0^\circ \pm 0.8376^\circ$ .

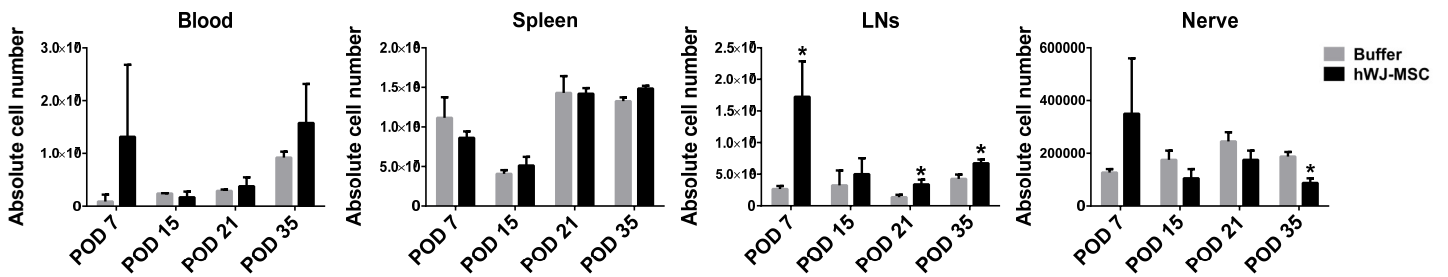

**Supplementary Figure 2. Total absolute number of immune cells in blood, spleen, LNs, and nerve-infiltrating cells between the buffer and hWJ-MSC groups over time.** Immune cells in the two groups (N=3) were harvested and analyzed using flow cytometry on POD7, 15, 21, and 35. The statistical data were represented as the mean  $\pm$  SD. \*P < 0.05.



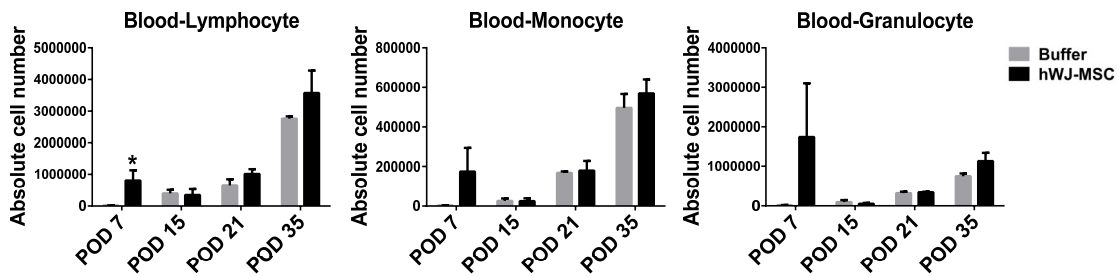

**Supplementary Figure 3. The absolute number of lymphocytes, monocytes, and granulocytes in blood between the buffer and hWJ-MSC groups over time.** Blood cells in the two groups (N=3) were harvested and analysed using flow cytometry on POD7, 15, 21, and 35. The statistical data were represented as the mean  $\pm$  SD. \*P < 0.05.

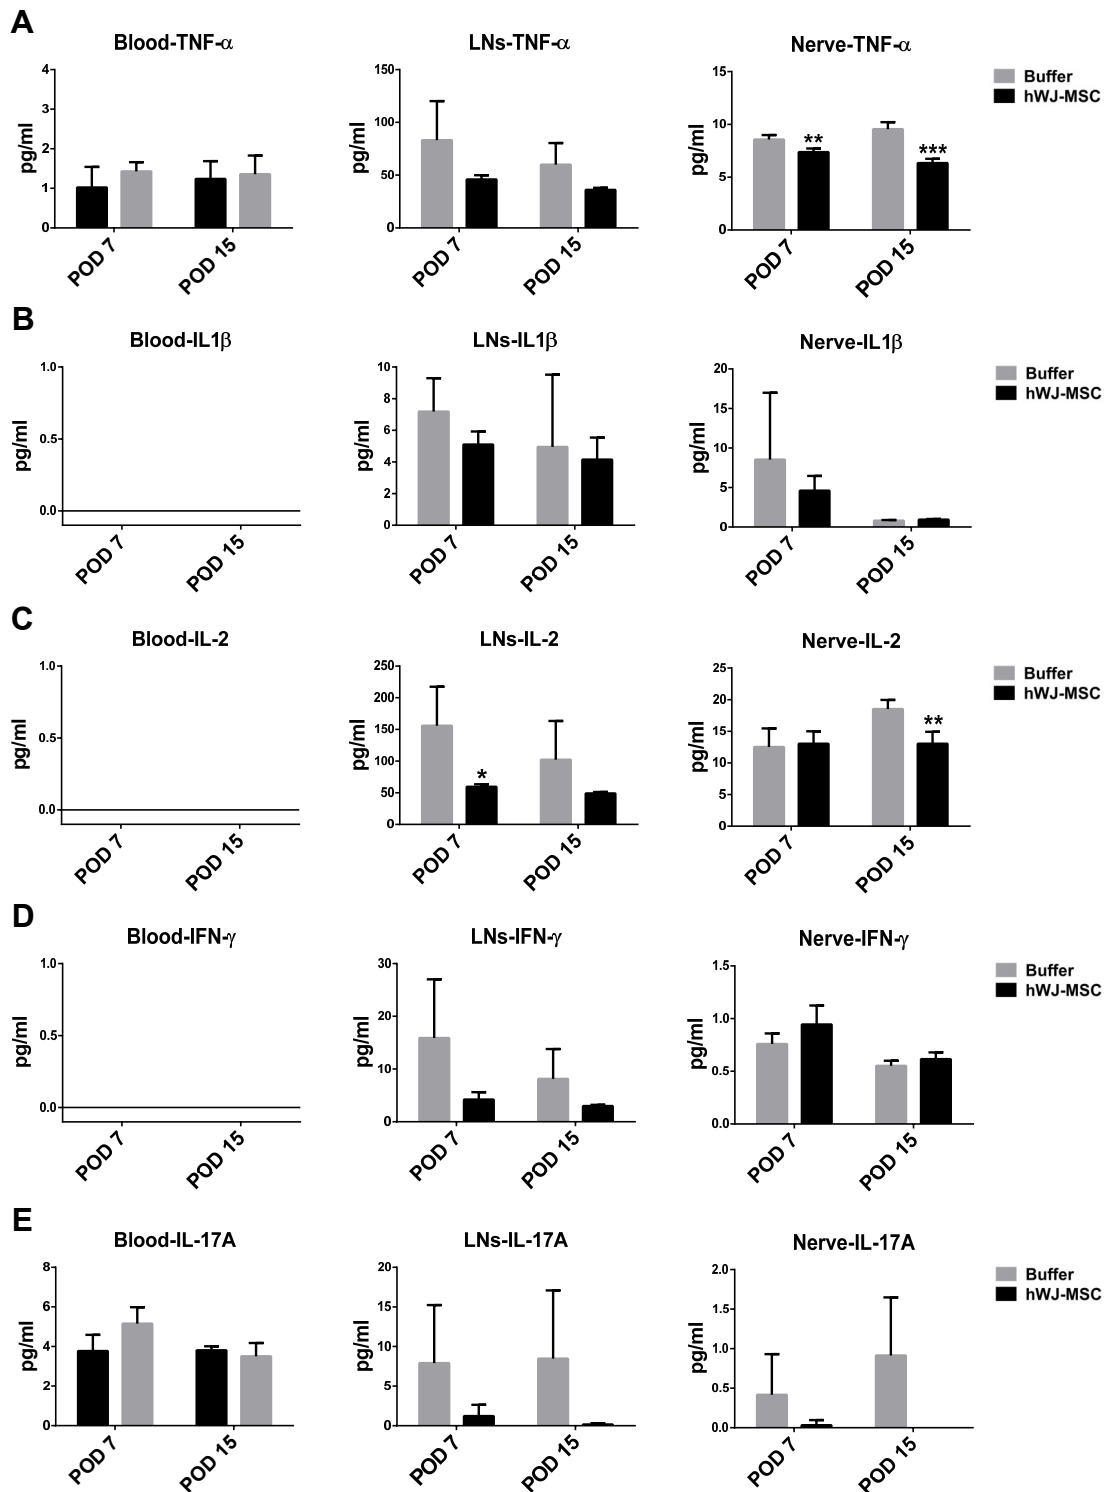

**Supplementary Figure 4. Pro-inflammatory cytokine expression.** Blood serum, LNs, and anastomosed sciatic nerves in the buffer and hWJ-MSC groups (N=3) were harvested on POD7 and 15. The cytokine expression of TNF- $\alpha$ , IL1 $\beta$ , IL-2, IFN- $\gamma$ , and IL17A was analyzed using ProcartaPlex Immunoassays and Luminex instrument platform. The statistical data were represented as the mean  $\pm$  SD. \*P < 0.05.

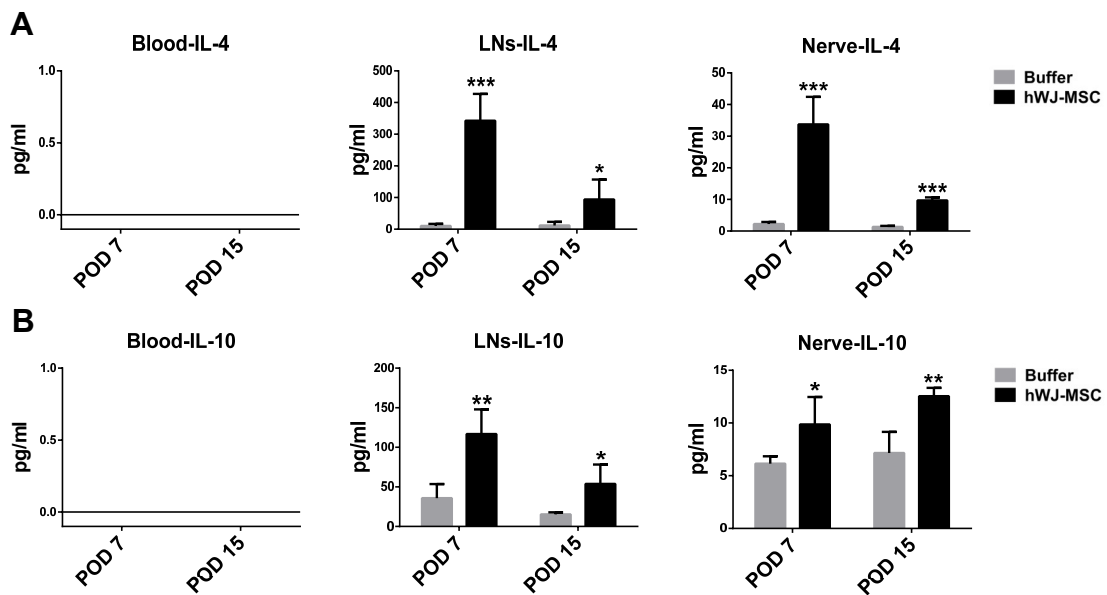

**Supplementary Figure 5. Anti-inflammatory cytokine expression.** Blood serum, LNs, and anastomosed sciatic nerves in the buffer and hWJ-MSC groups (N=3) were harvested on POD7 and 15. The cytokine expression of IL-4 and IL-10 was analyzed using ProcartaPlex Immunoassays and Luminex instrument platform. The statistical data were represented as the mean  $\pm$  SD. \*P < 0.05.

| Blood-Treg | Buffer        | hWJ-MSC        | Spleen-Treg | Buffer           | hWJ-MSC          |
|------------|---------------|----------------|-------------|------------------|------------------|
| POD 7      | 1224 ± 233.4  | 117061 ± 53390 | POD 7       | 2151000 ± 37634  | 1844000 ± 175099 |
| POD 15     | 13330 ± 7642  | 31959 ± 10710  | POD 15      | 1074000 ± 53108  | 1533000 ± 210611 |
| POD 21     | 23112 ± 446.7 | 27566 ± 1261   | POD 21      | 3303000 ± 104629 | 2845000 ± 242526 |
| POD 35     | 55985 ± 18662 | 147374 ± 26620 | POD 35      | 2580000 ± 26508  | 3020000 ± 17068  |

  

| LNs-Treg | Buffer        | hWJ-MSC        | Nerve-Treg | Buffer          | hWJ-MSC        |
|----------|---------------|----------------|------------|-----------------|----------------|
| POD 7    | 84991 ± 31172 | 447631 ± 80008 | POD 7      | 0.6482 ± 0.5526 | 29.91 ± 9.781  |
| POD 15   | 65129 ± 20588 | 134008 ± 45827 | POD 15     | 11.56 ± 3.889   | 48.71 ± 17.02  |
| POD 21   | 53685 ± 6745  | 113051 ± 22955 | POD 21     | 1.333 ± 0.3333  | 13.73 ± 0.4807 |
| POD 35   | 169513 ± 9513 | 286464 ± 18002 | POD 35     | 8.33 ± 1.33     | 13.03 ± 2.421  |

**Supplementary Figure 6. The absolute number (mean ± SD) of Tregs in blood, spleen, LNs, and nerve-infiltrating cells over time between the buffer and hWJ-MSC groups.**
